# Supplementary material for: CA-IX-Expressing Small Extracellular Vesicles (sEVs) Are Released by Melanoma Cells under Hypoxia and in the Blood of Advanced Melanoma Patients
Source: MDPI journal article supplement (doi:10.3390/ijms24076122), 2023-03-24
Supplement: s1 [file s1]

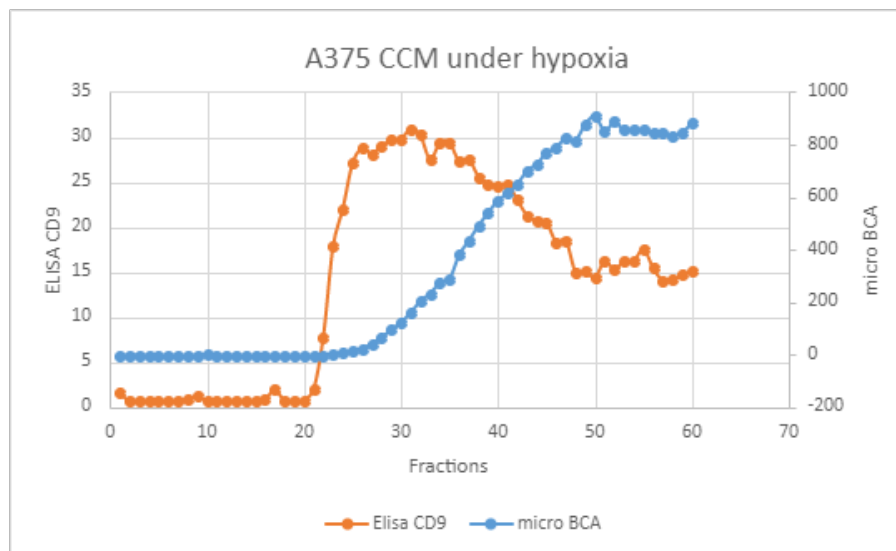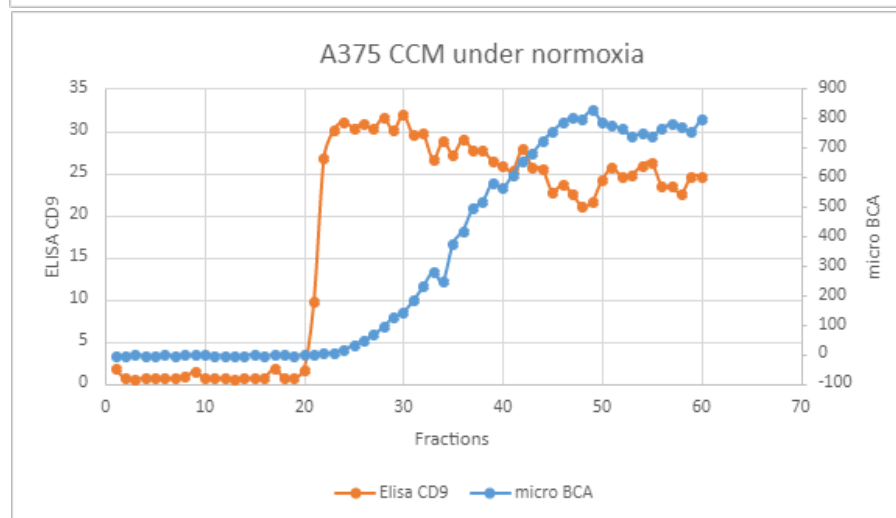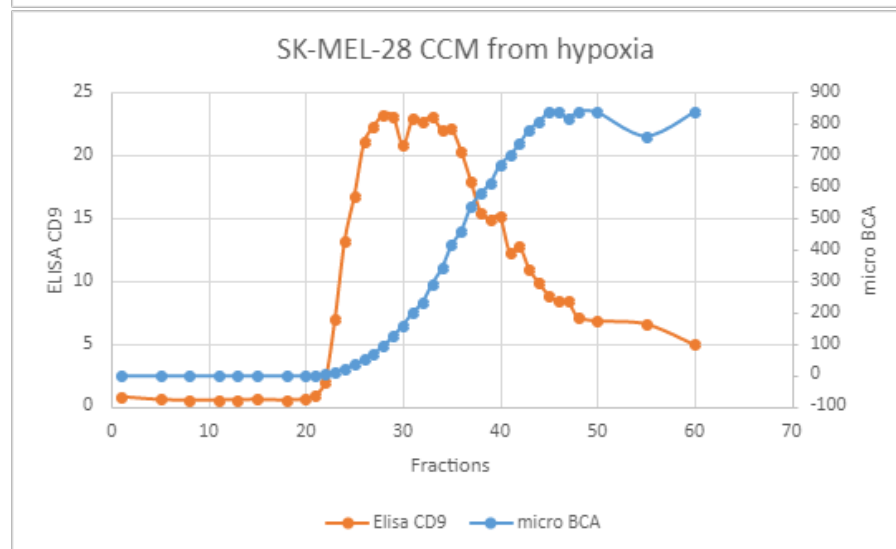

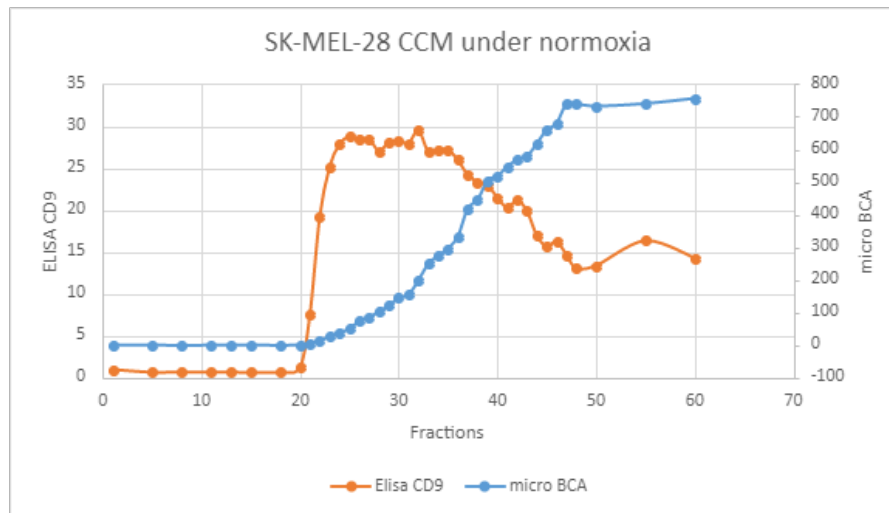

**Figure S1.** SEC chromatography elution profiles of CCM samples from melanoma cells, under normoxia and hypoxia.

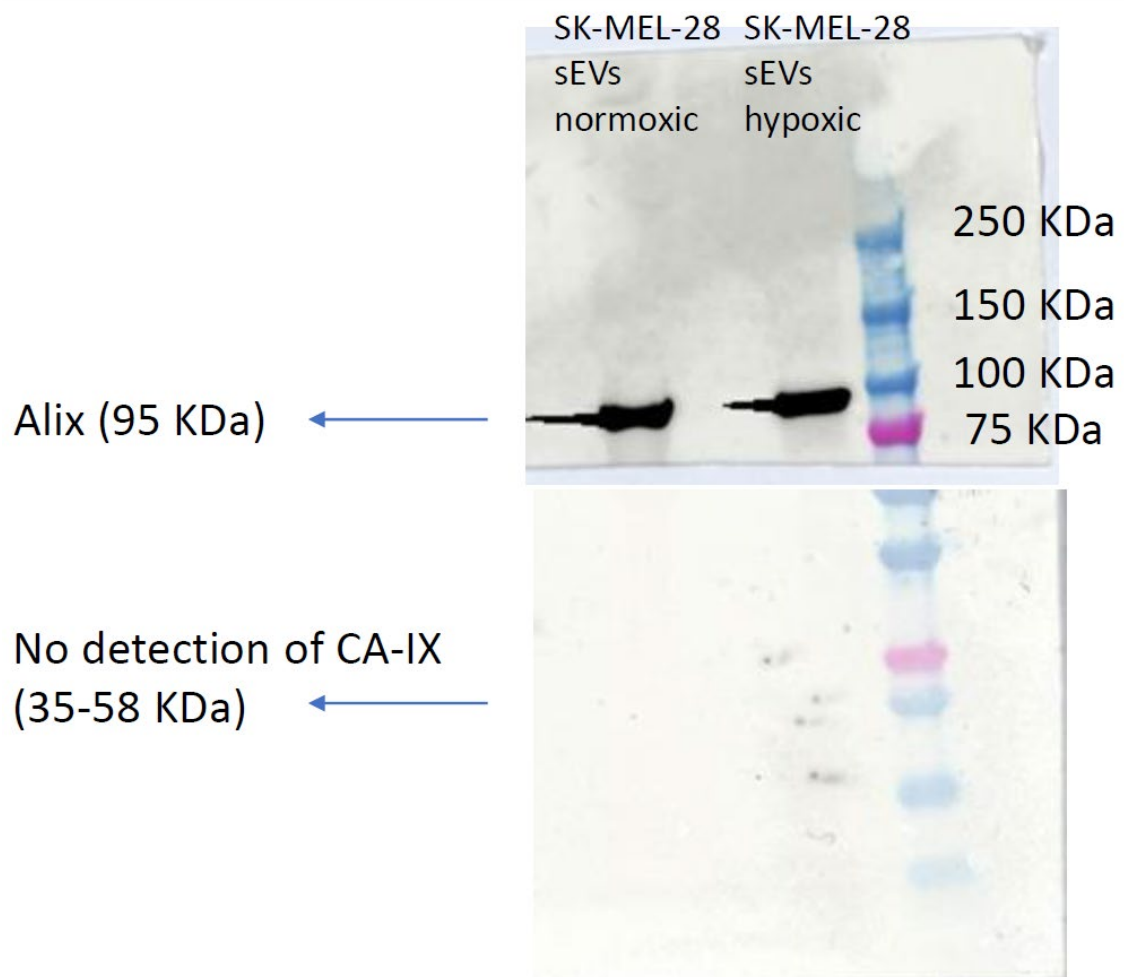

**Figure S2.** The CA-IX protein was not found on sEVs from the hypoxic SK-MEL-28 cells, while Alix was expressed in both conditions.
